# Supplementary material for: dCLIP: a computational approach for comparative CLIP-seq analyses
Source: PubMed Central journal article supplement (PMC4054096; doi:10.1186/gb-2014-15-1-r11), 2014-01-07
Supplement: gb-2014-15-1-r11-S3.pdf [file gb-2014-15-1-r11-S3.pdf]

```
$ head dCLIP_summary.bed
```

```
track name="dCLIP_summary" description="dCLIP_summary" itemRgb="On"
```

|       |         |         |   |    |   |         |         |         |
|-------|---------|---------|---|----|---|---------|---------|---------|
| chr18 | 3383080 | 3383179 | 1 | 0  | + | 3383080 | 3383179 | 0,255,0 |
| chr18 | 3383280 | 3383419 | 2 | 0  | + | 3383280 | 3383419 | 0,255,0 |
| chr18 | 3399830 | 3399839 | 3 | 0  | + | 3399830 | 3399839 | 0,255,0 |
| chr18 | 3399840 | 3399889 | 3 | 22 | + | 3399840 | 3399889 | 0,0,255 |
| chr18 | 3399890 | 3399909 | 3 | 0  | + | 3399890 | 3399909 | 0,255,0 |
| chr18 | 3399910 | 3399969 | 3 | 25 | + | 3399910 | 3399969 | 255,0,0 |
| chr18 | 3399970 | 3399999 | 3 | 0  | + | 3399970 | 3399999 | 0,255,0 |
| chr18 | 3405680 | 3405719 | 4 | 22 | + | 3405680 | 3405719 | 0,0,255 |
| chr18 | 3405720 | 3405789 | 4 | 0  | + | 3405720 | 3405789 | 0,255,0 |

```
$ head dCLIP_output.txt
```

| id | chrom | strand | position | state | probability | differential | tag1 | mut1 | tag2 | mut2 |
|----|-------|--------|----------|-------|-------------|--------------|------|------|------|------|
| 1  | chr18 | +      | 3383080  | 1     | 1.000       | 0.104        | 7    | 0    | 0    | 0    |
| 1  | chr18 | +      | 3383090  | 1     | 0.996       | 0.180        | 16   | 0    | 0    | 0    |
| 1  | chr18 | +      | 3383100  | 1     | 0.989       | 0.212        | 20   | 0    | 0    | 0    |
| 1  | chr18 | +      | 3383110  | 1     | 0.977       | 0.235        | 23   | 0    | 0    | 0    |
| 1  | chr18 | +      | 3383120  | 1     | 0.963       | 0.265        | 27   | 0    | 0    | 0    |
| 1  | chr18 | +      | 3383130  | 1     | 0.955       | 0.280        | 29   | 0    | 0    | 0    |
| 1  | chr18 | +      | 3383140  | 1     | 0.960       | 0.277        | 33   | 0    | 3    | 0    |
| 1  | chr18 | +      | 3383150  | 1     | 0.977       | 0.228        | 50   | 0    | 20   | 0    |
| 1  | chr18 | +      | 3383160  | 1     | 0.988       | 0.221        | 49   | 0    | 20   | 0    |

```
$ head File1_Mutant_pos.bedgraph
```

```
track type=bedGraph name="File1_Mutant_pos" description="File1_Mutant_pos"
```

|       |         |         |   |
|-------|---------|---------|---|
| chr18 | 3399865 | 3399866 | 2 |
| chr18 | 3414156 | 3414157 | 2 |
| chr18 | 3417607 | 3417608 | 1 |
| chr18 | 3421257 | 3421258 | 1 |
| chr18 | 3431526 | 3431527 | 1 |
| chr18 | 3431610 | 3431611 | 1 |
| chr18 | 3434051 | 3434052 | 3 |
| chr18 | 3435081 | 3435082 | 1 |
| chr18 | 3435322 | 3435323 | 1 |
